# Supplementary material for: Coronin7 regulates WASP and SCAR through CRIB mediated interaction with Rac proteins
Source: PubMed Central journal article supplement (PMC4585930; doi:10.1038/srep14437), 2015-09-28
Supplement: srep14437-s1.pdf [file srep14437-s1.pdf]

## **Supplementary Information**

### **Coronin7 regulates WASP and SCAR through CRIB mediated interaction with Rac proteins**

Karthic Swaminathan, Maria Stumpf, Rolf Müller, Anna-Carolin Horn, Julia Schmidbauer, Ludwig Eichinger, Annette Müller-Taubenberger, Jan Faix, Angelika A. Noegel

## Supplementary Tables

**Supplementary Table 1. Rescue potential of Mutant CRN7 proteins.**

| Phenotype                      | AX2    | <i>corB</i> <sup>-</sup>    | CRN7 WT                       | MUT1                          | MUT2                 | MUT3                          |
|--------------------------------|--------|-----------------------------|-------------------------------|-------------------------------|----------------------|-------------------------------|
| Motility                       | WT     | reduced                     | WT                            | WT                            | WT                   | like <i>corB</i> <sup>-</sup> |
| cAMP induced F-actin assembly  | WT     | enhanced first peak         | WT                            | WT                            | WT                   | WT                            |
| Actin rod formation 10 min (%) | WT 30% | enhanced 45%                | enhanced 52%                  | enhanced 54%                  | lower than WT 12.8%  | WT 25.4%                      |
| Phagocytosis                   | WT     | enhanced                    | WT                            | WT                            | WT                   | like <i>corB</i> <sup>-</sup> |
| Adhesion                       | WT     | enhanced as compared to AX2 | like <i>corB</i> <sup>-</sup> | closer to WT                  | closer to WT         | like <i>corB</i> <sup>-</sup> |
| Development                    | WT     | enhanced                    | like AX2 (WT)                 | like <i>corB</i> <sup>-</sup> | slower, closer to WT | like <i>corB</i> <sup>-</sup> |

**Supplementary Table 2. Rescue activities of WASP, SCAR, PakA-c in *corB*<sup>-</sup>.**

| Phenotype             | <i>corB</i> <sup>-</sup>    | <i>corB</i> <sup>-</sup> GFP-WASP                    | <i>corB</i> <sup>-</sup> GFP-SCAR        | <i>corB</i> <sup>-</sup> PAKa-C             |
|-----------------------|-----------------------------|------------------------------------------------------|------------------------------------------|---------------------------------------------|
| Cell motility         | reduced                     | reduced, not different from <i>corB</i> <sup>-</sup> | not tested                               | not tested                                  |
| Adhesion in percent   | enhanced as compared to AX2 | like <i>corB</i> <sup>-</sup>                        | like <i>corB</i> <sup>-</sup>            | less adhesive than <i>corB</i> <sup>-</sup> |
| Yeast Phagocytosis    | enhanced as compared to AX2 | like AX2                                             | like <i>corB</i> <sup>-</sup>            | not tested                                  |
| Development           | faster as compared to AX2   | like <i>corB</i> <sup>-</sup>                        | delayed; multiple tips                   | like <i>corB</i> <sup>-</sup>               |
| Total F-actin content | 1                           | 1.03±0.1, like <i>corB</i> <sup>-</sup>              | 0.99±0.24, like <i>corB</i> <sup>-</sup> | not tested                                  |
| Cell size             | similar to AX2              | increased as compared to <i>corB</i> <sup>-</sup>    | comparable to <i>corB</i> <sup>-</sup>   | not tested                                  |

## **Legends to Supplementary Figures**

### **Supplementary Figure S1. Comparison of CRN7 and coronin in Rac binding assays.**

GST tagged RacC and RacE were loaded with GDP or GTP $\gamma$ S and pulldown assays performed with lysate from *corB*<sup>-</sup> cells expressing GFP-CRN7 WT. The resulting blot was probed for the presence of GFP-CRN7 WT at 130 kDa with mAb K3-184-2 and coronin at 55 kDa with mAb 176-3-6. I, input lysate.

### **Supplementary Figure S2. Binding of CRN7 and CRIB mutants to various Rac proteins.**

(a) Binding of MUT1 to various Rac proteins. GST tagged Rac proteins were loaded with GDP or GTP $\gamma$ S and used to precipitate GFP-MUT1. Absolute intensities are shown in order to demonstrate the different interaction strengths. (b) Binding of CRN7 and CRIB mutants to Rac proteins as indicated. The data are mean values obtained from several experiments. Relative intensities (in percent) are shown.

**Supplementary Figure S3. Association of CRN7 CRIB mutant proteins with the actin cytoskeleton.** Triton X-100-insoluble cytoskeletons were prepared from cells expressing the various GFP-tagged proteins and supernatant and pellet fractions analyzed by western blotting using mAb K3-184-2. Equivalent amounts were loaded. In case of MUT1 five times higher amounts of the supernatant fraction was loaded.

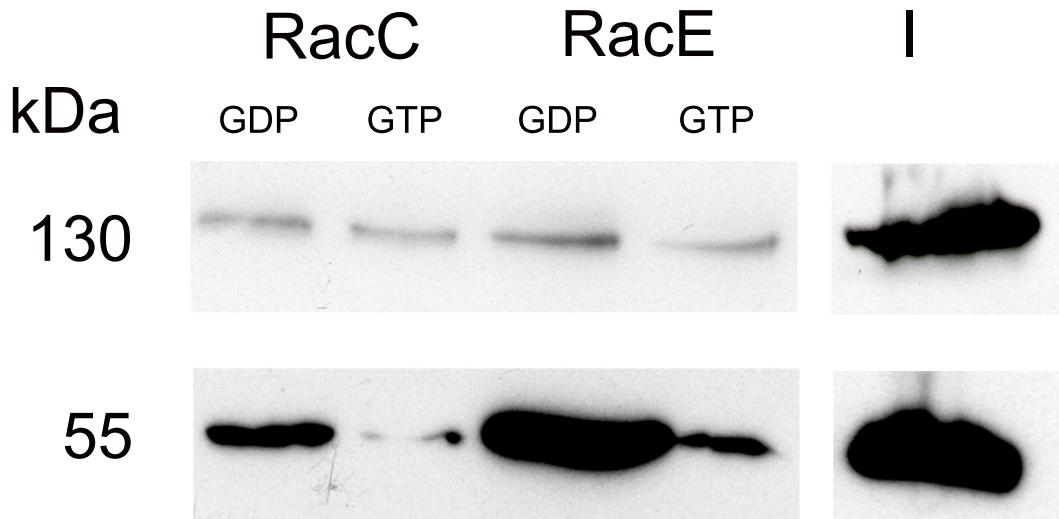

Figure S1

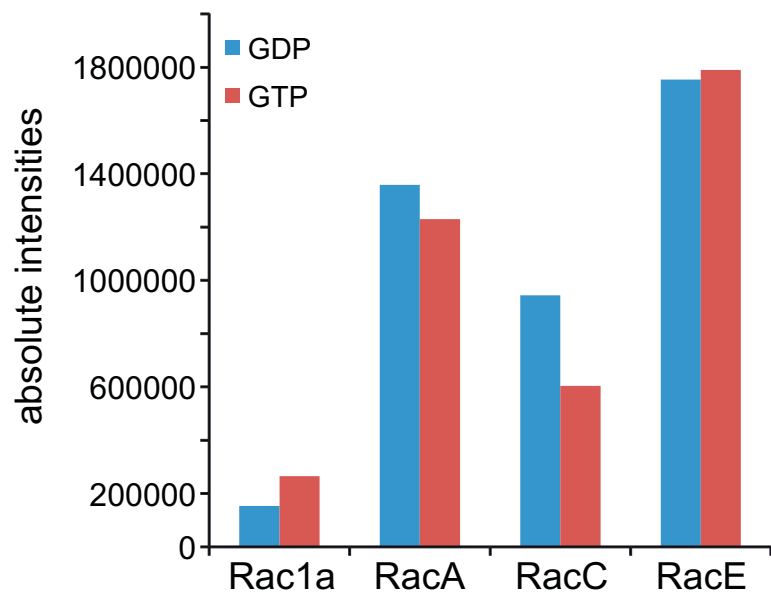

Figure S2a

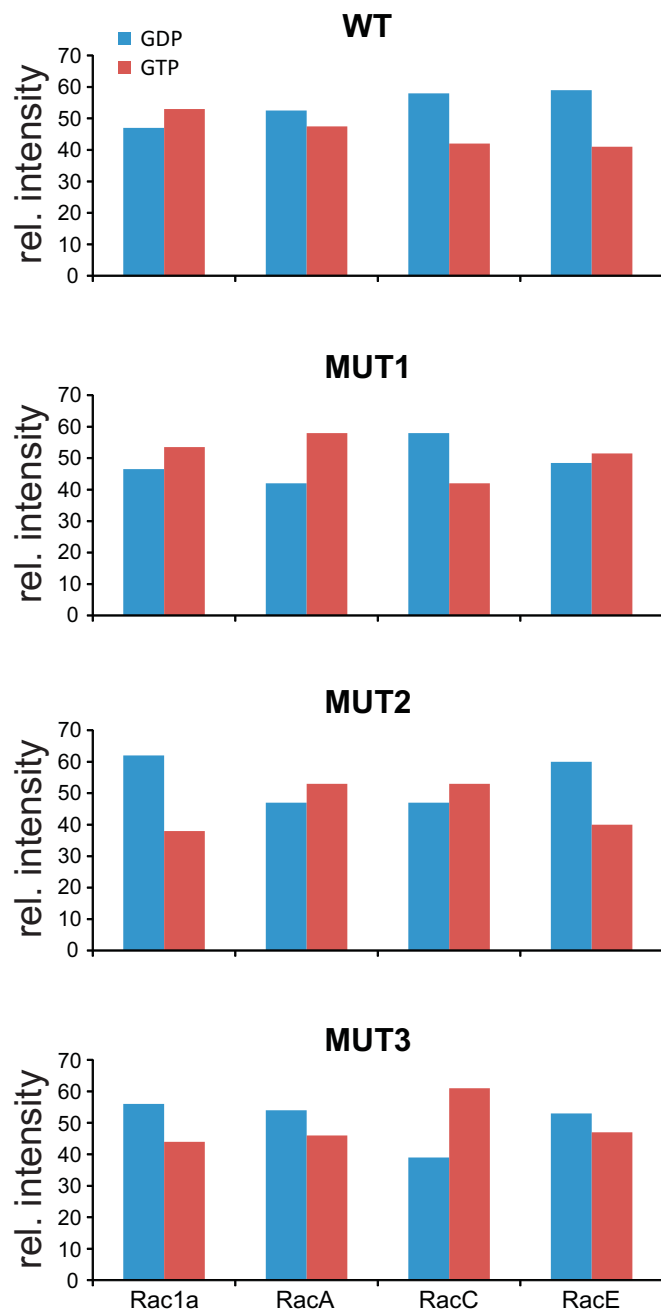

Figure S2b

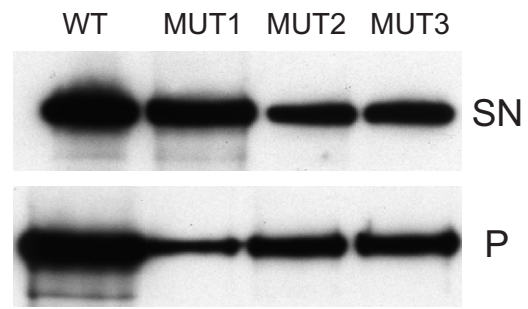

Figure S3
